# Supplementary material for: Transitioning to Digital Systems: The Role of World Health Organization’s Digital Adaptation Kits in Operationalizing Recommendations and Interoperability Standards
Source: PubMed Central journal article supplement (PMC8885357; doi:10.9745/ghsp-d-21-00320), 2022-02-28
Supplement: GHSP-D-21-00320_Supplement.pdf [file GHSP-D-21-00320_Supplement.pdf]

## Supplement. Examples of different components of World Health Organization Digital Adaptation Kit

### Supplement Figure 1. Example of personas (component 2) in family planning Digital Adaptation Kit

#### Nurse-Midwife, Rural Kenya





#### My Tasks

**75%** Maternal and child health along with comprehensive obstetric care:

- Administering immunizations.
- Meeting with women for routine antenatal care appointments.
- Educating women on the importance of family planning and family planning methods
- Supplying sexual and reproductive health services
- Providing skilled delivery in the maternity ward

**25%** Administrative duties:

- Set up clinic area.
- Fill out registers along with maternal and child health cards.
- Manage reproductive health and other supplies





#### My Workplace

**Sub-County Hospital**

- The sub-county hospital provides services for seven wards in the Western Region of Kenya and serves about 150,000 people, mostly subsistence farmers.
- The hospital operates 24 hours, although the clinic is only open from 8:00am – 5:00pm Monday through Saturday.
- Two nurses rotate through the maternity ward, reproductive health, and child health clinic.
- Two nurses and four community health workers have received ASRH training.

#### My Typical Day

- 8am** Arrive at work, begin my normal nursing agenda, check stock, and round on each service area
- 9am** Check clients that have arrived, provide group education if necessary and begin working cue
- 11am** Mother in maternity ward is about to give birth  
Pause reproductive health services and attend to mother and child
- 1pm** Deliver birth dose of immunizations, take a quick lunch.  
Check on other units and reproductive health cue
- 3pm** Community Health Worker alerts that a young girl has arrived and move her to the front of cue

***“Tools are never enough. The regimen changes daily and needs to be continually updated.”***

**Supplement to:** Tamrat T, Ratanaprayul N, Barreix M, et al. Transitioning to digital systems: the role of World Health Organization digital adaptation kits in operationalizing recommendations and standards. *Glob Health Sci Pract.* 2022;10(1):2100320. <https://doi.org/10.9745/GHSP-D-21-00320>

**Supplement Figure 2. Example of workflow (component 4) in Sexually Transmitted Infection Digital Adaptation Kit**

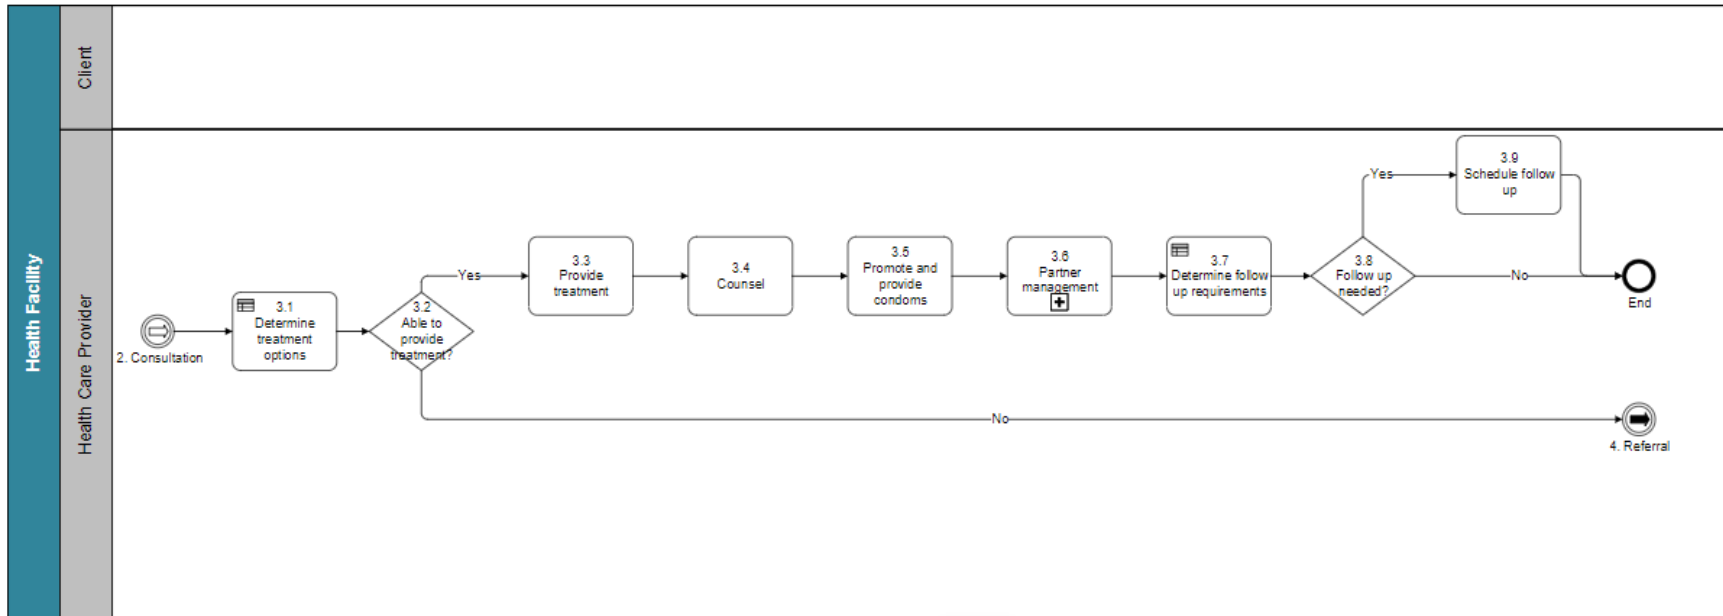

**Supplement to:** Tamrat T, Ratanaprayul N, Barreix M, et al. Transitioning to digital systems: the role of World Health Organization digital adaptation kits in operationalizing recommendations and standards. *Glob Health Sci Pract.* 2022;10(1):2100320. <https://doi.org/10.9745/GHSP-D-21-00320>

**Supplement Figure 3. Example of data dictionary (component 5) in HIV Digital Adaptation Kit**

| Activity ID                       | Data Element Label                                                                                                                    | Description and Definition                                                                                                                                                                                                                          | Multiple Choice Type (if applicable) | Data Type  | Input Options               | ICD-11 Code                | ICD-11 URI                                                                                    | ICD-11 Comments / Considerations                   |
|-----------------------------------|---------------------------------------------------------------------------------------------------------------------------------------|-----------------------------------------------------------------------------------------------------------------------------------------------------------------------------------------------------------------------------------------------------|--------------------------------------|------------|-----------------------------|----------------------------|-----------------------------------------------------------------------------------------------|----------------------------------------------------|
| HIV.H. Record outreach and result | Client outcome                                                                                                                        | The outcome for the client which is used for reporting retention. Included in total attrition from antiretroviral therapy (ART): death, stopped treatment and lost to follow-up. On antiretroviral therapy (ART) is included so that client outcome | Select one                           | Coding     | N/A                         |                            |                                                                                               |                                                    |
|                                   | Lost to follow up                                                                                                                     | Twenty-eight days or more since last missed appointment                                                                                                                                                                                             | Input Option                         | Codes      | Lost to follow-up           | Not classifiable in ICD-11 |                                                                                               |                                                    |
|                                   | Transferred out                                                                                                                       | The client transferred to another facility                                                                                                                                                                                                          | Input option                         | Codes      | Transferred out             | Not classifiable in ICD-11 |                                                                                               |                                                    |
|                                   | Death (documented)                                                                                                                    | People living with HIV previously on antiretroviral therapy (ART) who are confirmed to have died from any cause.                                                                                                                                    | Input option                         | Codes      | Death (documented)          | MH13                       | <a href="http://id.who.int/icd/entity/1876291018">http://id.who.int/icd/entity/1876291018</a> | Code title: Unattended death                       |
|                                   | Refused (stopped) treatment                                                                                                           | Client was contacted and confirmed to have stopped antiretroviral therapy (ART). (Reasons may include stigma and discrimination, faith healing, etc.)                                                                                               | Input option                         | Codes      | Refused (stopped) treatment | QC49                       | <a href="http://id.who.int/icd/entity/1626712964">http://id.who.int/icd/entity/1626712964</a> | Code title: Personal history of noncompliance with |
|                                   | On ART                                                                                                                                | Client is currently taking antiretroviral medication                                                                                                                                                                                                | Input option                         | Codes      | On ART                      | XM63K0                     | <a href="http://id.who.int/icd/entity/1722279370">http://id.who.int/icd/entity/1722279370</a> | Code title: Anti-infective antiviral               |
|                                   | Date client outcome changed                                                                                                           | The date on which the client's outcome (lost to follow up, transferred out, death (documented), or refused (stopped) treatment) changed                                                                                                             | N/A                                  | Date       | N/A                         |                            |                                                                                               |                                                    |
|                                   | Transfer confirmed                                                                                                                    | Select if transfer to another facility is confirmed                                                                                                                                                                                                 | N/A                                  | Boolean    | True/False                  | Not classifiable in ICD-11 |                                                                                               | True False                                         |
|                                   | Transfer To facility                                                                                                                  | Name of health facility client was transferred to                                                                                                                                                                                                   | Select one                           | Coding     | N/A                         | Not classifiable in ICD-11 |                                                                                               | Free text field                                    |
|                                   | Date of transfer out                                                                                                                  | The date the client transferred out of the facility to be provided with care at another facility                                                                                                                                                    | N/A                                  | Date       | N/A                         | Not classifiable in ICD-11 |                                                                                               | Date                                               |
| Adherence assessment              | Whether client is adherent or not to antiretroviral therapy regimen per national guidelines (immunological or virological monitoring) |                                                                                                                                                                                                                                                     | Boolean                              | True/False |                             |                            | Not classifiable in ICD-11                                                                    |                                                    |

**Supplement to:** Tamrat T, Ratanaprayul N, Barreix M, et al. Transitioning to digital systems: the role of World Health Organization digital adaptation kits in operationalizing recommendations and standards. *Glob Health Sci Pract.* 2022;10(1):2100320. <https://doi.org/10.9745/GHSP-D-21-00320>

**Figure 4. Example of decision-support logic table (component 6) in ANC DAK**

| Decision ID                                      |                              | ANC.DT.26 Pre-eclampsia risk counselling                                                                                   |                                |                                        |                                                             |                                                        |                                                                                                                                                                                                                                                                          |                                                                                                        |  |
|--------------------------------------------------|------------------------------|----------------------------------------------------------------------------------------------------------------------------|--------------------------------|----------------------------------------|-------------------------------------------------------------|--------------------------------------------------------|--------------------------------------------------------------------------------------------------------------------------------------------------------------------------------------------------------------------------------------------------------------------------|--------------------------------------------------------------------------------------------------------|--|
| Business Rule                                    |                              | If the woman has risk factors for developing pre-eclampsia, provide counselling to reduce risk of developing pre-eclampsia |                                |                                        |                                                             |                                                        |                                                                                                                                                                                                                                                                          |                                                                                                        |  |
| Trigger                                          |                              | ANC.B6. Collect woman's profile & history                                                                                  |                                |                                        |                                                             |                                                        |                                                                                                                                                                                                                                                                          |                                                                                                        |  |
| Input(s)                                         |                              | Output                                                                                                                     | Action                         | Annotations                            | Reference(s)                                                |                                                        |                                                                                                                                                                                                                                                                          |                                                                                                        |  |
| 'Number of fetuses' ≥ 2                          | 'Gestational age' ≥ 12 weeks | 'Population with low dietary calcium intake' =                                                                             | 'Risk of pre-eclampsia' = TRUE | Provide pre-eclampsia risk counselling | 'Amount of daily aspirin prescribed until delivery' = 75 mg | 1.5 g ≤ 'Amount of calcium supplements provided' ≤ 2 g | The woman is at risk of developing pre-eclampsia: provide counselling; prescribe aspirin 75 mg daily until delivery (starting at 12 weeks gestation) and ensure that she continues to take her daily calcium supplement of 1.5–2 g until delivery for pre-eclampsia risk | Pregnancy, childbirth, postpartum and new care guide (2015): C3 (1)<br>WHO pre-eclampsia and eclampsia |  |
| 'Past pregnancy complications' = 'Pre-eclampsia' | 'Gestational age' ≥ 12 weeks | 'Population with low dietary calcium intake' =                                                                             | 'Risk of pre-eclampsia' = TRUE | Provide pre-eclampsia risk counselling | 'Amount of daily aspirin prescribed until delivery' = 75 mg | 1.5 g ≤ 'Amount of calcium supplements provided' ≤ 2 g |                                                                                                                                                                                                                                                                          | Pregnancy, childbirth, postpartum and new care guide (2015): C3 (1)<br>WHO pre-eclampsia and eclampsia |  |
| 'Past pregnancy complications' = 'Eclampsia'     | 'Gestational age' ≥ 12 weeks | 'Population with low dietary calcium intake' =                                                                             | 'Risk of pre-eclampsia' = TRUE | Provide pre-eclampsia risk counselling | 'Amount of daily aspirin prescribed until delivery' = 75 mg | 1.5 g ≤ 'Amount of calcium supplements provided' ≤ 2 g |                                                                                                                                                                                                                                                                          | Pregnancy, childbirth, postpartum and new care guide (2015): C3 (1)<br>WHO pre-eclampsia and eclampsia |  |
| 'Past pregnancy complications' = 'Convulsions'   | 'Gestational age' ≥ 12 weeks | 'Population with low dietary calcium intake' =                                                                             | 'Risk of pre-eclampsia' = TRUE | Provide pre-eclampsia risk counselling | 'Amount of daily aspirin prescribed until delivery' = 75 mg | 1.5 g ≤ 'Amount of calcium supplements provided' ≤ 2 g |                                                                                                                                                                                                                                                                          | Pregnancy, childbirth, postpartum and new care guide (2015): C3 (1)<br>WHO pre-eclampsia and eclampsia |  |
| 'Existing chronic health conditions' =           | 'Gestational age' ≥ 12 weeks | 'Population with low dietary calcium intake' =                                                                             | 'Risk of pre-eclampsia' = TRUE | Provide pre-eclampsia risk counselling | 'Amount of daily aspirin prescribed until delivery' = 75 mg | 1.5 g ≤ 'Amount of calcium supplements provided' ≤ 2 g |                                                                                                                                                                                                                                                                          | Pregnancy, childbirth, postpartum and new care guide (2015): C3 (1)<br>WHO pre-eclampsia and eclampsia |  |
| 'Existing chronic health conditions' =           | 'Gestational age' ≥ 12 weeks | 'Population with low dietary calcium intake' =                                                                             | 'Risk of pre-eclampsia' = TRUE | Provide pre-eclampsia risk counselling | 'Amount of daily aspirin prescribed until delivery' = 75 mg | 1.5 g ≤ 'Amount of calcium supplements provided' ≤ 2 g |                                                                                                                                                                                                                                                                          | Pregnancy, childbirth, postpartum and new care guide (2015): C3 (1)<br>WHO pre-eclampsia and eclampsia |  |
| 'Existing chronic health conditions' =           | 'Gestational age' ≥ 12 weeks | 'Population with low dietary calcium intake' =                                                                             | 'Risk of pre-eclampsia' = TRUE | Provide pre-eclampsia risk counselling | 'Amount of daily aspirin prescribed until delivery' = 75 mg | 1.5 g ≤ 'Amount of calcium supplements provided' ≤ 2 g |                                                                                                                                                                                                                                                                          | Pregnancy, childbirth, postpartum and new care guide (2015): C3 (1)<br>WHO pre-eclampsia and eclampsia |  |
| 'Existing chronic health conditions' =           | 'Gestational age' ≥ 12 weeks | 'Population with low dietary calcium intake' =                                                                             | 'Risk of pre-eclampsia' = TRUE | Provide pre-eclampsia risk counselling | 'Amount of daily aspirin prescribed until delivery' = 75 mg | 1.5 g ≤ 'Amount of calcium supplements provided' ≤ 2 g |                                                                                                                                                                                                                                                                          | Pregnancy, childbirth, postpartum and new care guide (2015): C3 (1)<br>WHO pre-eclampsia and eclampsia |  |
